# Supplementary material
Source: PubMed Central journal article supplement (PMC11188997)
Supplement: NIHMS1999054-supplement-Supplement.pdf [file NIHMS1999054-supplement-Supplement.pdf]

**Supplemental Table 1. CFIR Constructs and Related Codes from our Analysis**

| <b>Domains</b>     | <b>CFIR Construct</b>                                                                      | <b>Categories of Related Codes</b>           | <b>Examples of Related Codes</b>                                                   |
|--------------------|--------------------------------------------------------------------------------------------|----------------------------------------------|------------------------------------------------------------------------------------|
| <b>Individuals</b> | <b>Needs (similar to Patient Needs and Resources construct from previous CFIR version)</b> | Positives                                    | Video visit was beneficial to my general health, quality of life, well-being       |
|                    |                                                                                            | Negatives                                    | Participant's device didn't work                                                   |
|                    |                                                                                            | Technology assistance                        | Participant received help from the in-home scientist before or during the visit    |
|                    |                                                                                            | Technology usage                             | Participant owns their own device(s)                                               |
|                    |                                                                                            | In-person troubleshooting                    | In-home team member helped set up the device                                       |
|                    |                                                                                            | Participant motivators                       | Participant is looking for help from pharmacist and/or medication support          |
|                    |                                                                                            | Video medication reconciliation facilitators | Participant had good health literacy                                               |
|                    | <b>Motivation (similar to Individual state of Change construct)</b>                        | Positives                                    | Video visit was convenient for participant                                         |
|                    |                                                                                            | Negatives                                    | Participant has auditory impairment that made conducting the video visit difficult |
|                    |                                                                                            | Perceived benefit                            | Participant believes pharmacists should do video visits                            |

|                   |                                                        |                                              |                                                                                            |
|-------------------|--------------------------------------------------------|----------------------------------------------|--------------------------------------------------------------------------------------------|
|                   |                                                        | Video medication reconciliation facilitators | Participant had good health literacy                                                       |
|                   | <b>Capability (similar to Self-efficacy construct)</b> | Technology usage                             | Participant regularly uses their device for internet-only capability, including healthcare |
|                   |                                                        | In-person troubleshooting                    | In-home team member helped set up video after clicking the hyperlink                       |
|                   |                                                        | Video medication reconciliation facilitators | Participant had good health literacy                                                       |
| <b>Innovation</b> | <b>Adaptability</b>                                    | In-person troubleshooting                    | In-home team member helped with the video visit platform                                   |
|                   |                                                        | Video medication reconciliation facilitators | Participant had to move to go get medications                                              |
|                   | <b>Relative advantage</b>                              | Positives                                    | Participant has had a positive experience with video visit before                          |
|                   |                                                        | Negatives                                    | Prefers face to face visits                                                                |
|                   |                                                        | Technology assistance                        | Participant has used video visit before with healthcare provider                           |
|                   |                                                        | Participant motivators                       | Participant thinks video visits are better for quality of care than phone visits           |
|                   | <b>Complexity</b>                                      | Positives                                    | Participant had no problems connecting to the video visit                                  |
|                   |                                                        | Negatives                                    | Participant could not figure out how                                                       |

|                      |                                   |                                              |                                                                     |
|----------------------|-----------------------------------|----------------------------------------------|---------------------------------------------------------------------|
|                      |                                   |                                              | to use the video visit platform                                     |
|                      |                                   | In-person troubleshooting                    | In-home team member helped find or made a new hyperlink for visit   |
|                      |                                   | Video medication reconciliation facilitators | Participant had medications in one place                            |
| <b>Inner Setting</b> | <b>Structural characteristics</b> | Technology assistance                        | Participant has used video visit before with healthcare provider    |
|                      |                                   | In-person troubleshooting                    | In-home team member helped with how to use the video visit platform |
